# Supplementary material for: Monochromatic visible light-driven photocatalysis realized on 2D ZnO shell arrays
Source: Royal Society of Chemistry journal article supplement (doi:10.1039/c3ta11742a), 2013-01-01
Supplement: c3ta11742a.pdf [file c3ta11742a.pdf]

## Supporting Information

### Monochromatic visible-light driven photocatalysis realized on 2D ZnO shell arrays

5

Fei Wang<sup>1,2</sup>, Dongxu Zhao<sup>1\*</sup>, Zhikun Xu<sup>1,2</sup>, Zhongkui Zheng<sup>1</sup>

<sup>1</sup>State key laboratory of luminescence and applications, Changchun Institute of Optics, Fine Mechanics and Physics, Chinese Academy of Sciences, No.3888 Dongnanhu Road, Changchun, 130033, People's Republic of China

<sup>2</sup>Graduate University of the Chinese Academy of Sciences, Beijing 100049, People's Republic of China

\*e-mail: dxzhao2000@yahoo.com.cn

15

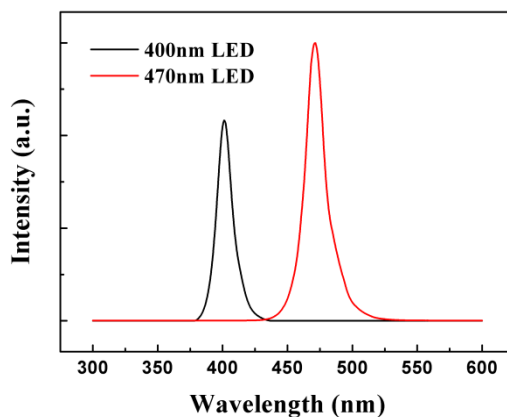

20 **Figure S1.** The emission spectra of commercial LEDs. We see the monochromatic emission peaks of LEDs located at 400nm and 470nm separately. So they could be served as visible light sources.

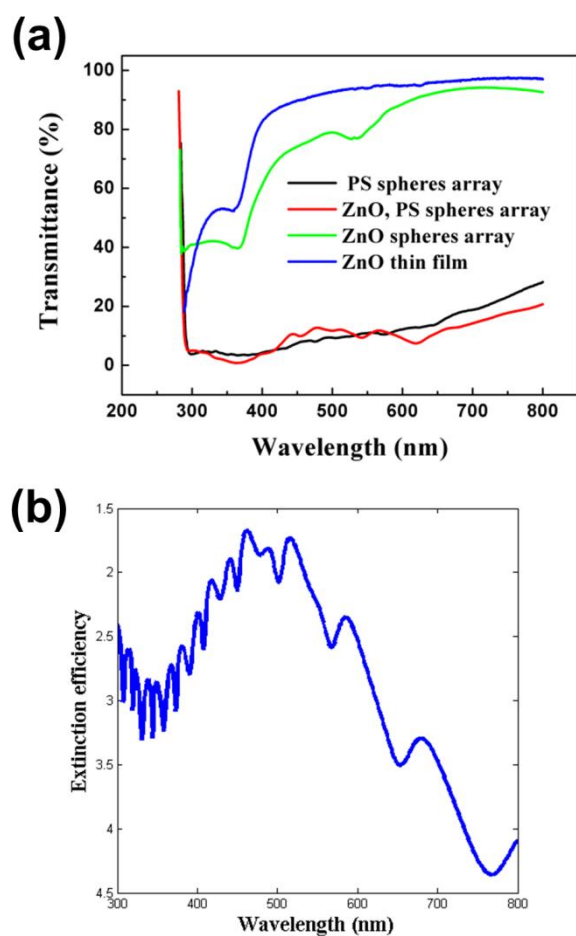

**Figure S2.** The optical transmission spectra (a) and simulated extinction spectrum (b) of 2D array of 1000nm PS spheres. It doesn't have a distinct band structure because the diffraction of 1000nm PS sphere array is not obvious in visible light region. But we could also identify the simulated peaks located at 650nm was enhanced after coating with ZnO and blue-shifted twice to 540nm, which supports our opinion.
